# Supplementary material for: The Stress Granule RNA-Binding Protein TIAR-1 Protects Female Germ Cells from Heat Shock in Caenorhabditis elegans
Source: PubMed Central journal article supplement (PMC4825639; doi:10.1534/g3.115.026815), 2016-02-09
Supplement: supp_g3.115.026815_TableS1.pdf [file supp_g3.115.026815_TableS1.pdf]

**Table S1. Strains used in this study.**

| Strain | Genotype                                                                         |
|--------|----------------------------------------------------------------------------------|
| N2     | Wild type, Bristol isolate                                                       |
| DG1612 | <i>vab-1(dx31)/mIn1 [dpy-10(e128) mIs14] II; fog-2(q71) V</i>                    |
| DG3862 | <i>unc-4(e120) vab-1(dx31) II</i>                                                |
| DG3883 | <i>tiar-1(tm361) unc-4(e120) II</i>                                              |
| DG3922 | <i>tiar-1(tn1545[tiar-1::gfp::tev::s]) II</i>                                    |
| DG3929 | <i>tiar-1(tn1543) II</i>                                                         |
| HT1593 | <i>unc-119(ed3) III</i>                                                          |
| JK987  | <i>tra-2(q276)/mnC1 dpy-10(e128) unc-52(e444) II</i>                             |
| RN054  | <i>tiar-1(tn1545) II; fog-2(q71) V</i>                                           |
| RN055  | <i>tiar-1(tn1543) II; tiar-3(ok144) X</i>                                        |
| RN063  | <i>tiar-1(tn1543) tiar-2(tm2923) II; tiar-3(ok144) X</i>                         |
| RN064  | <i>tiar-1(tn1543) tiar-2(tm2923) II</i>                                          |
| RN065  | <i>tiar-1(tn1543) II; gpls1[Phsp-16-2::GFP]<sup>a</sup></i>                      |
| RN066  | <i>tiar-1(tn1543) II; fog-2(q71) V</i>                                           |
| RN067  | <i>tiar-3(ok144) X</i>                                                           |
| RN068  | <i>tiar-2(tm2923) II</i>                                                         |
| RN076  | <i>tiar-1(tm361) II</i>                                                          |
| RN077  | <i>tiar-1(tm361) xmSi02[Ptiar-1::tiar-1::gfp::tiar-1 3utr; Cb-unc-119(+)] II</i> |
| TJ375  | <i>gpls1[Phsp-16-2::GFP]<sup>a</sup></i>                                         |

<sup>a</sup> The LG for the insertion has not been defined.
