# Supplementary material for: The Stress Granule RNA-Binding Protein TIAR-1 Protects Female Germ Cells from Heat Shock in Caenorhabditis elegans
Source: PubMed Central journal article supplement (PMC4825639; doi:10.1534/g3.115.026815), 2016-02-09
Supplement: supp_g3.115.026815_TableS2.pdf [file supp_g3.115.026815_TableS2.pdf]

**Table S2. Primers used to produce new *tiar-1* alleles with CRISPR-Cas9 genome editing.**

| Name                            | Sequence                                                                        | Use in genome editing <sup>a</sup> |
|---------------------------------|---------------------------------------------------------------------------------|------------------------------------|
| 001 Nest upstream fow           | ggacgcttttggctactg                                                              |                                    |
| 002 Nest upstream rev           | accgttccgagatgaaatc                                                             | <i>tiar-1</i> template             |
| 003 Nest orf+UTR fow            | tccgcactgtttttattgg                                                             | from genomic                       |
| 004 Nest orf+UTR rev            | aacctcaacccccagaaatg                                                            | DNA                                |
| 005 Nest downstream fow         | tttgcaatggcacgtattc                                                             |                                    |
| 007 Del BlueS rev               | ATCGATACCGTCGACCTC                                                              |                                    |
| 008 Del <i>tiar</i> upstATG fow | ggtcgacggtatcgatTTAAGAAGACCAGCAGCG                                              |                                    |
| 009 Del <i>tiar</i> upstATG rev | acgaagttatGGCTTAAATGATAGATCCCTG                                                 |                                    |
| 010 Del unc-119 fow             | atthaagccataacttcgatatagcatacattatacgaagttatCTAGA<br>ATCCTATGCTTGAC             | <i>tiar-1</i> deletion:<br>Gibson  |
| 011 Del unc-119 rev             | acgaagttatTTATGCATCATATGAGTAGTCG                                                | assembly                           |
| 012 Del <i>tiar-1</i> downs fow | gatgcataaataacttcgtataatgtatgctatacgaagttatATTGA<br>GTTTCGAAAATGTTTATTTCCATTTTC |                                    |
| 013 Del <i>tiar-1</i> downs rev | ctagaactagtgatccCGCCGGTAGGTTTCTAGC                                              |                                    |
| 014 Del BlueS fow               | GGATCCACTAGTTCTAGAGC                                                            |                                    |
| 015 Ins BlueS rev               | ATCGATACCGTCGACCTC                                                              |                                    |
| 016 Ins <i>tiar</i> orf fow     | tcgaggtcgacggtatcgatATGTCCTTCTTCAACCCAC                                         |                                    |
| 017 Ins <i>tiar</i> orf rev     | tctcctttctTTGATGTCCTCCAGAGTTC                                                   |                                    |
| 018 Ins gfp fow                 | aggacatcaaAGAAAGGAGACAGCTGCAG                                                   | <i>tiar-1</i> GFP                  |
| 019 Ins gfp rev                 | atactggagtCTATTTGTATAGTTCATCCATGCC                                              | fusion Gibson                      |
| 020 Ins <i>tiar</i> 3'utr fow   | atacaaatagACTCCAGTATTTTTTAAAAACATTTTA<br>TATG                                   | assembly                           |
| 021 Ins <i>tiar</i> 3'utr rev   | tacgaagttatAAGACTTTACCCTCGCATTTATTATTG                                          |                                    |
| 022 Ins unc-119 fow             | gtaaagtcttataacttcgatatagcatacattatacgaagttatCTAG                               |                                    |

|                        |                                                                        |                     |
|------------------------|------------------------------------------------------------------------|---------------------|
|                        | AATCCTATGCTTGCAC                                                       |                     |
| 023 Ins unc-119 rev    | tacgaagttatTTATGCATCATATGAGTAGTCG                                      |                     |
| 024 Ins tiar downs fow | TGATGCATAAataacttcgtatagcatacattatacgaagtatat<br>tgagtcgaaaatgtttatttc |                     |
| 025 Ins tiar downs rev | gctctagaactagtgatccCGCCGGTAGGTTTCTAGC                                  |                     |
| 026 Ins BlueS fow      | GGATCCACTAGTTCTAGAGC                                                   |                     |
| 048 sgRNA 2 tiar-1 fow | gccgtactcGTTTTAGAGCTAGAAATAGCAAG                                       |                     |
| 049 sgRNA 2 tiar-1 rev | tgtgagtttcCAAGACATCTCGCAATAGG                                          | sgRNA <i>tiar-1</i> |

---

<sup>a</sup> Details of strain constructions are available upon request.
