# Supplementary material for: The Stress Granule RNA-Binding Protein TIAR-1 Protects Female Germ Cells from Heat Shock in Caenorhabditis elegans
Source: PubMed Central journal article supplement (PMC4825639; doi:10.1534/g3.115.026815), 2016-02-09
Supplement: supp_g3.115.026815_TableS3.pdf [file supp_g3.115.026815_TableS3.pdf]

**Table S3. Infertility of *tiar-1* mutant strains at 25°**

| Genotype                                            | % Infertility |
|-----------------------------------------------------|---------------|
| <i>tiar-1(tm361)</i> <sup>a</sup>                   | 76 (n=71)     |
| <i>tiar-1(tm361) unc-4(e120)</i> <sup>b</sup>       | 21 (n=128)    |
| <i>tiar-1(tn1543)</i> <sup>c</sup>                  | 21 (n=105)    |
| <i>tiar-1(tn1543) tiar-2 (tm2923);tiar-3(ok144)</i> | 25 (n=93)     |

Strains of the indicated genotype were grown at 25°C. Two day-old adult animals were mounted and observed under the microscope. A hermaphrodite was considered as “Infertile” if it did not contain a single embryo at the observed time point.

<sup>a</sup> The infertility of this strain was quantified before backcrossing it by following recombination events with the strain *unc-4(e120) vab-1(dx31)*.

<sup>b</sup> 36% of *tiar-1(tm361) unc-4(e120)* hermaphrodites grown continually at 25°C exhibited sterility (n=239). Animals were scored as sterile if they produced no viable progeny.

<sup>c</sup> 30% of *tiar-1(tn1543)* hermaphrodites grown continually at 25°C exhibited sterility (n=300). Animals were scored as sterile if they produced no viable progeny.
